# Supplementary material for: Structural and compositional diversity of fibrillin microfibrils in human tissues
Source: PubMed Central journal article supplement (PMC5892578; doi:10.1074/jbc.ra117.001483), 2018-02-16

## Structural and compositional diversity of fibrillin microfibrils in human tissues

Alexander Eckersley<sup>1</sup>, Kieran T. Mellody<sup>1</sup>, Suzanne Pilkington<sup>2</sup>, Christopher E.M. Griffiths<sup>2,5</sup>, Rachel E.B. Watson<sup>2,5</sup>, Ronan O'Cualain<sup>3</sup>, Clair Baldock<sup>1,4</sup>, David Knight<sup>3</sup>, Michael J. Sherratt<sup>1\*</sup>

From the <sup>1</sup>Division of Cell Matrix Biology & Regenerative Medicine, <sup>2</sup>Division of Musculoskeletal & Dermatological Sciences, <sup>3</sup>School of Biological Sciences, <sup>4</sup>The Wellcome Trust Centre for Cell-Matrix Research, Faculty of Biology, Medicine and Health, The University of Manchester and <sup>5</sup>NIHR Manchester Biomedical Research Centre, Central Manchester University Hospitals NHS Foundation Trust, Manchester Academic Health Science Centre, Manchester, UK

### Supporting Information

**Figure S1. The elastase method and advances in MS technology led to the improved detection of COL6A3 peptides compared to previous published efforts.** The ability of the elastase method to produce COL6A3 peptides from a single human CB sample (F67) and single human skin sample (F49) is compared to efforts made by Beecher *et al.* 2011 (55) from a single bovine cornea sample. Beecher *et al.* identified COL6A3 peptides from Von Willebrand A domains (vWA) N1-N9 of N-terminal globular region, C1 of the C-terminal globular region and from the triple-helix domain (coloured grey since number of peptide hits was unreported). Since the CB is a collagen VI-poor region in comparison to cornea, our methods only detected peptides from vWA domains N1-N4 and C1 of the globular regions from the human CB-microfibril extract (F67) leading to a lower primary coverage than that by Beecher *et al.* However, when our methods were applied to human skin (F49), a collagen VI-rich tissue, we achieved a COL6A3 primary coverage which was more than double that of Beecher *et al.* 2011 (55) .

**Table S1 (uploaded as a separate excel file). Combined table of all fibrillin microfibril co-purifying proteins (Protein Prophet FDR≤0.1%) identified using LC-MS/MS.** Peptide spectrum matches (Peptide Prophet FDR≤5%) are shown for each sample and for each tissue.

**Fig. S1**

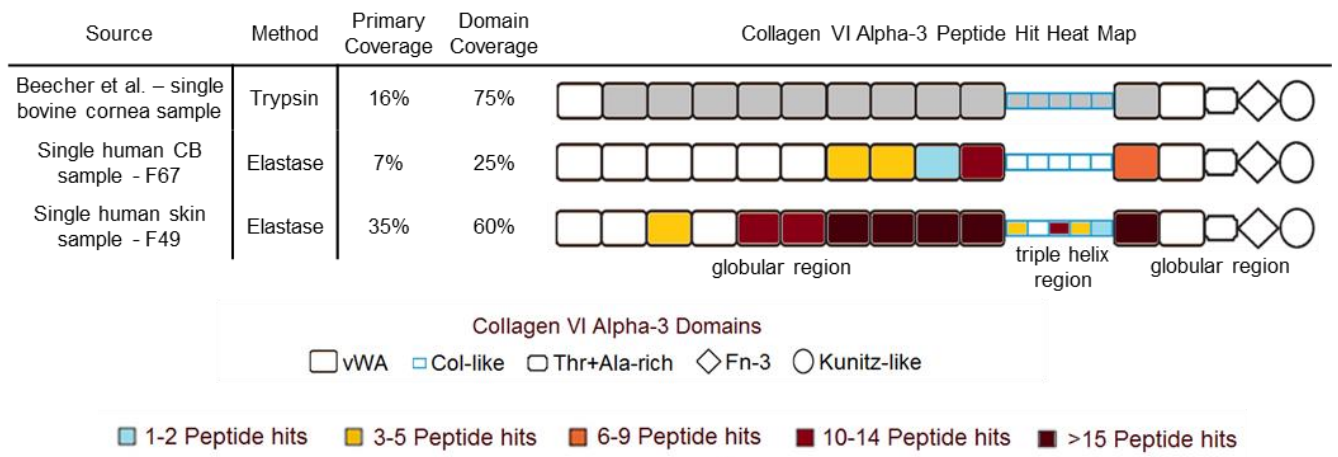

Supplement: supp_RA117.001483_134705_2_supp_66963_p3hrc3.pdf [file supp_RA117.001483_134705_2_supp_66963_p3hrc3.pdf]
